# Supplementary figures and images for: Syntheses, structures and magnetic properties of the lanthanide complexes of the pyrimidyl-substituted nitronyl nitroxide radical
Source: Royal Society of Chemistry journal article supplement (doi:10.1039/c7dt01037k), 2017-01-01

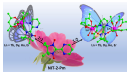

Supplement: c7dt01037k3.pdf [file c7dt01037k3.pdf]
